# Supplementary material
Source: PubMed Central journal article supplement (PMC4460475)
Supplement: pnas.201507741SI.pdf [file pnas.201507741SI.pdf]

# Supporting Information

Xiao et al. 10.1073/pnas.1507741112

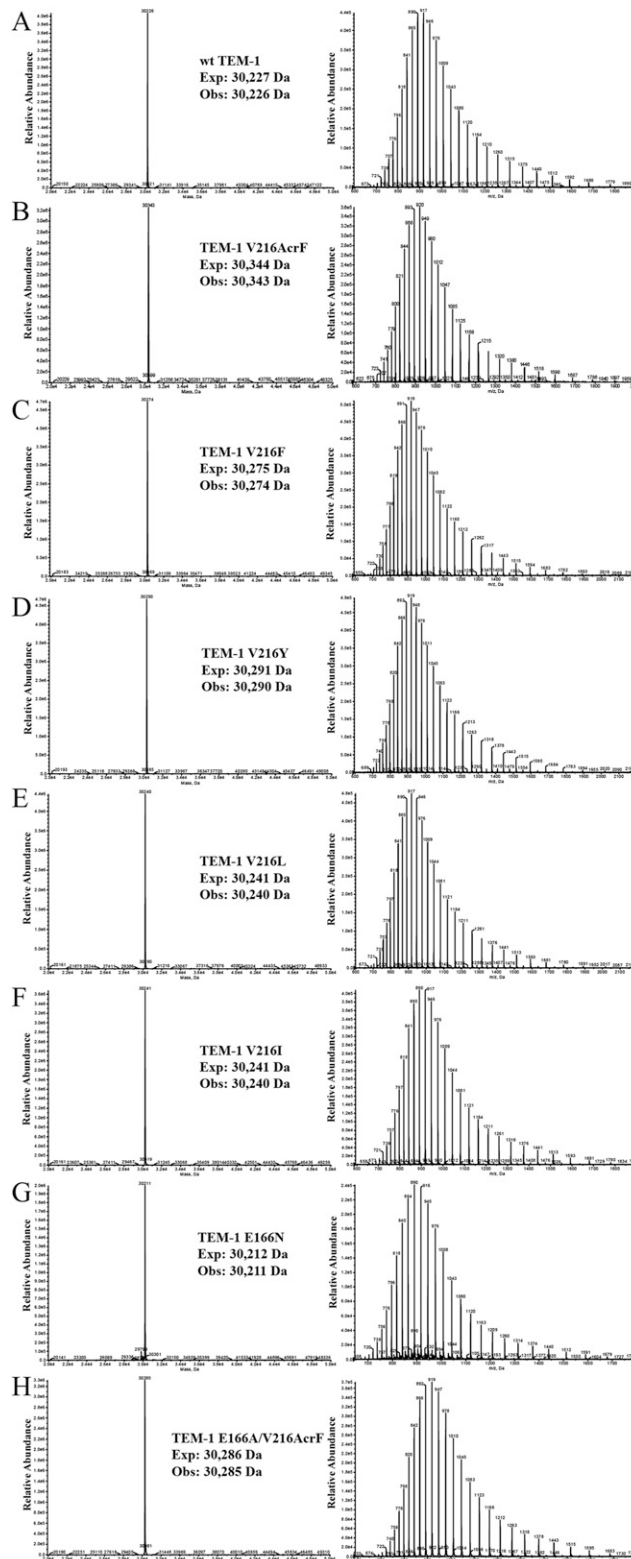

Fig. S1. ESI-MS spectra of wild-type and mutant  $\beta$ -lactamases.

**Table S1. MICs of ceftazidime for D179X mutant enzymes**

| Amino acid 179 | MIC, $\mu\text{g}\cdot\text{mL}^{-1}$ |
|----------------|---------------------------------------|
| AzMeF          | 14                                    |
| AcF            | 4                                     |
| BrF            | 8                                     |
| Asp            | 0.25                                  |
| Tyr            | 4                                     |
| Phe            | 4                                     |
| Cys            | 2                                     |
| Glu            | 0.25                                  |
| Ala            | 1                                     |
| Ser            | 2                                     |
| His            | 1                                     |
| Gln            | 1                                     |
| Pro            | 0.5                                   |
| TAG (no ncAA)  | 0.125                                 |
| O-allyl-Y      | 4                                     |
| AzF            | 4                                     |
| Met            | 4                                     |
| Gly            | 4                                     |
| Trp            | 2                                     |
| Leu            | 1                                     |
| Ile            | 0.5                                   |
| Val            | 0.25                                  |
| Thr            | 0.25                                  |
| Arg            | 0.5                                   |
| Lys            | 0.25                                  |
| Asn            | 8                                     |

**Table S2. MICs of cephalexin for wild-type and Val-216-AcrF mutant  $\beta$ -lactamases in the presence of various ncAAs**

| ncAA      | Enzyme MIC, $\mu\text{g}\cdot\text{mL}^{-1}$ |         |
|-----------|----------------------------------------------|---------|
|           | Wild-type                                    | V216TAG |
| no ncAA   | 10                                           | <10     |
| AcrF      | 10                                           | 90      |
| IF        | 20                                           | 10      |
| BrF       | 30                                           | 20      |
| AcF       | 10                                           | 10      |
| OMeY      | 20                                           | 10      |
| AzF       | 20                                           | 10      |
| O-allyl-Y | 10                                           | 10      |
| AzMeF     | 30                                           | 30      |
| PheF      | 20                                           | 20      |
| OtBuY     | 20                                           | 10      |

OMeY, O-methyl-tyrosine; OtBuY, O-tert-butyl-tyrosine; PheF, biphenylalanine.

**Table S3. DNA oligomers used to prepare the library**

| Oligonucleotide | Nucleotide sequence (5'–3')             | Oligonucleotide | Nucleotide sequence (5'–3')             | Oligonucleotide | Nucleotide sequence (5'–3')               |
|-----------------|-----------------------------------------|-----------------|-----------------------------------------|-----------------|-------------------------------------------|
| 37tagFwd        | gaagatTAGttgggtgcaacaggtgggttacatcgaac  | 121tagFwd       | gaatattAGagtgctgccataaacacatgagtgataaac | 200tagFwd       | ctctaTAGtccccggcaacaataatagactggatg       |
| 37tagRev        | cacccactAatcttcagcatcttttactttccaccgc   | 121tagRev       | gcaactATAatcttcactgtcatgccatccg         | 200tagRev       | cgggaCTAagagtagtagtccgcagttaatag          |
| 38tagFwd        | gatacagTAGgggtcagaggtgggtttacatcgaactgg | 122tagFwd       | ttatgctTAGgctgccataaacatgagtgataaacactg | 201tagFwd       | ctagctTAGcggcaacaataatagactggatgg         |
| 38tagRev        | gcaccCTAactgctctcagatcttttactttcaacc    | 122tagRev       | ggcagCTAGcctaatcttactgtcatgcccactc      | 201tagRev       | gttgccqCTAagctagtagtaagtagttccccagttaa    |
| 39tagFwd        | cagttTAGcgcagagtggtttacatcgaactcggatc   | 123tagFwd       | ggatTAGgcccataaacatgagtgataaacactggg    | 202tagFwd       | gcttcCTAGcaacaataatagactggatggagggcg      |
| 39tagRev        | ggtgCTAcaactgatcttcagcatcttttactttc     | 123tagRev       | ttatggcCTAaacataaattctctactgtcatgcc     | 202tagRev       | ttggtCTAGgaatagtagtagtaagtagttccgcagttaat |
| 40tagFwd        | tggtTAGcaggtgggttacatcgaactggatctc      | 124tagFwd       | cagtgctTAGaataaccatgagtgataaacactggggc  | 203tagFwd       | ccggTAGcaataatagactggatggagggcgaataag     |
| 40tagRev        | cactcCTAaaccactgatcttcagcatcttttac      | 124tagRev       | ggttatCTAagcactgcaataatctcttactgtc      | 203tagRev       | taattCTAaccgggaactgtagtaagtagttccgcag     |
| 41tagFwd        | gtgcaTAGgtgggtttacatcgaactggatctcaac    | 125tagFwd       | gctccCTAGaccactgagtgataaacactggcggcaac  | 204tagFwd       | cggcaATAGcttaatagactggatggagggcggataaag   |
| 41tagRev        | cccaCTAagcccactgatcttcagatcttttac       | 125tagRev       | ctaggtTAGgagcactgcaataatctcttactgtc     | 204tagRev       | ctataaCTATAgccgggaactgtagtagtaagtagttc    |
| 42tagFwd        | caagTAGgtttacatcgaactggatctcaacagc      | 126tagFwd       | ggcaatTAGtagttagtataaacactggcggcaacttac | 205tagFwd       | caacaATAAGatagactggatggagggcggataaag      |
| 42tagRev        | gtaacCTAfcgtgaccccactgatcttcagatctc     | 126tagRev       | cactcaCTAatgggagcactgcaataatctcttacc    | 205tagRev       | gtctatCTAgtttgcccgggaagctagtagtaagtag     |
| 43tagFwd        | cgaggtTAGTAcatacgaactggatctcaacagcgg    | 127tagFwd       | ataaactTAGagtgataaacactggcggcaacttacttc | 206tagFwd       | caatataTAGgactggatggagggcgataaaagttag     |
| 43tagRev        | gattgCTAcaactcgtgcccactgatcttcagc       | 127tagRev       | ataactTAGagtgataaacactggcggcaacttacttc  | 206tagRev       | tcagctCTATAaattggttccggggaacttagtagtaag   |
| 44tagFwd        | gtgggtTAGatcgaactggatctcaacagcggtaag    | 128tagFwd       | ccatgTAGgataaacactggcggcaacttactgtc     | 207tagFwd       | ttataTAGctggatggagggcgataaaagttagcaggac   |
| 44tagRev        | tcgatCTAaaccactcgtgaccccactgatcttc      | 128tagRev       | ggtatCTAcaatggtttatggagcactgcaataatc    | 207tagRev       | ctcccaCTAatattatggttccggggaacttagag       |
| 45tagFwd        | gttacTAGgaactggatctcaacagcggtaagatcc    | 129tagFwd       | catgagTAgaaactggcggcaacttacttctgac      | 208tagFwd       | atagactTAGagggagggcgataaaagttagcaggacc    |
| 45tagRev        | cagttCTAgaaccactcgtgcccactgatc          | 129tagRev       | gtggtCTAaactcatggtttatggcagcactgataaat  | 208tagRev       | ctccatCTAgtctatataattggttccggggaacttag    |
| 46tagFwd        | taactTAGctggatctcaacagcggtaagatctctg    | 130tagFwd       | gtgataTAGaactggtcccaacttactctgcaaac     | 209tagFwd       | gactggTAGagggcgataaaagttagcaggaccactc     |
| 46tagRev        | tcgaCTAAGatgaaccactcgtgcaaccactgt       | 130tagRev       | gcaactCTAatcactcctggttagcgaactgac       | 209tagRev       | gectcCTAaccagctctatataattggttccggggaagc   |
| 47tagFwd        | atcgaatTAGgactcaacagcggtaagatcttgagag   | 131tagFwd       | gataactTAGggcggcacaacttactctgcaaacgac   | 210tagFwd       | ggatgTAGgctgataaaagttagcaggaccactctg      |
| 47tagRev        | gagatCTAatcagatgaaccactcgtgcaaccac      | 131tagRev       | ggccCTAGtatacctcctatggtttatggagcaac     | 210tagRev       | atccgCTAatccactctatataattggttccgggg       |
| 48tagFwd        | gaactgTAGctcaacagcggtaagatcttgagag      | 132tagFwd       | aaactTAGgccaacttactctgcaaacagatcgg      | 211tagFwd       | gatgggTAGGataaaagttagcaggaccactctgccc     |
| 48tagRev        | gttgagCTAagttcagttgataaccactcgtgcaacc   | 132tagRev       | gttggcCTAGtgttatacctcctggtttatggcagc    | 211tagRev       | cttataCTAactcctcactcctcctcctcctcctcctc    |
| 49tagFwd        | ctggatTAGaacaagcggtaagatcttgagagttctc   | 133tagFwd       | ctcgtTAGaacttactctgcaaacagatcggagg      | 212tagFwd       | gaggcCTAAGaacttagcaggaccactctgctcctgg     |
| 49tagRev        | ctgtCTAatccactcgtgataaccactcgtg         | 133tagRev       | taagtCTAagcaggtttatcactcctggttatggc     | 212tagRev       | caacttCTAaccctcctcctcctcctcctcctcctc      |
| 60tagFwd        | ttcgtTAGaagaactgtttcccaatgagtagcact     | 134tagFwd       | ggcctTAGTtactctgcaaacagatcggagcaacc     | 213tagFwd       | gggatTAGgttagcaggaccactctgctcctgg         |
| 60tagRev        | ttctcCTAagcgaactcctcaagatcttaccgc       | 134tagRev       | gaagtataCTAgcccgaggtttactcactcctggttatg | 213tagRev       | gcaactATAatccgctcctcctcctcctcctcctc       |
| 61tagFwd        | gccccTAGaagctttcccaatgagtagcacttttaaaag | 152tagFwd       | tttgcaCTAGatgggggagatcagtaactcctcctc    | 214tagFwd       | gataaaTAGcaggaccactctctgctcggccctc        |
| 61tagRev        | cgttcCTAagggggcaaacctcctcaagatctcacc    | 152tagRev       | cccccaCTAgtgcaaaaaagcggttagctcctcgg     | 214tagRev       | gactcCTAatctcctcctcctcctcctcctcctc        |
| 62tagFwd        | ccgaatTAGcgttttcccaatgagtagcacttttaaaag | 153tagFwd       | caaacTAGggggatcagtaactcctcctcctcctc     | 215tagFwd       | taagtTAGgggaccactctcctcctcctcctcctc       |
| 62tagRev        | gaaaaCTAatcggggcgaaaaactcctcaagatc      | 153tagRev       | gatccccTAGttagtgcaaaaagcggttagctcct     | 215tagRev       | gtggctCTAaacttctcctcctcctcctcctcctc       |
| 63tagFwd        | gagaaTAGTttcccaatgagtagcacttttaaaagtcc  | 154tagFwd       | caacatgTAGgactgatcagtaactcctcctcctcctc  | 216tagFwd       | gttgcaTAGcactctcctcctcctcctcctcctc        |
| 63tagRev        | ggaaCTAatctcctcggggcgaaaaactcctcaag     | 154tagRev       | catgactCTAactgttgcaaaaaagcggttagctc     | 216tagRev       | gaagtggCTAagcaacttctcctcctcctcctcctc      |
| 64tagFwd        | gaacgtTAGcctaagtagtagcacttttaaaagtctg   | 155tagFwd       | catgggTAGcactgtaactcctcctcctcctcctc     | 217tagFwd       | gcaaggTAGcttctcctcctcctcctcctcctc         |
| 64tagRev        | caatggCTAacgtttctcggggcgaaaaactcctcaag  | 155tagRev       | tacatgCTAccccctggttgcaaaaaagcggtttag    | 217tagRev       | caagaCTAatcctgcaacttctcctcctcctcctc       |
| 65tagFwd        | cgtttTAGatgagtagcacttttaaaagtctcgtatg   | 156tagFwd       | ggggatTAGgttaactcctcctcctcctcctcctc     | 218tagFwd       | ggaaCTAAGctcctcctcctcctcctcctcctc         |
| 65tagRev        | catcatCTAaaaactcctcctcggggcgaaaaactc    | 156tagRev       | gttaactATAccccctggttgcaaaaaagcgg        | 218tagRev       | ggcagCTAatggctcctcctcctcctcctcctc         |
| 66tagFwd        | ttccaTAGtagcacttttaaaagtctcgtatctg      | 157tagFwd       | gatcatTAGactcctcctcctcctcctcctcctc      | 219tagFwd       | ccaactTAGcctcctcctcctcctcctcctcctc        |
| 66tagRev        | ctcctCTAatgggaactcctcctcggggcgaaaaa     | 157tagRev       | ggcagCTAatgatccccctcctcctcctcctcctc     | 219tagRev       | cgagcCTAaagtgtcctgcaacttctcctcctc         |
| 67tagFwd        | ccaatgTAGgacttttaaaagtctcgtatctgctggc   | 158tagFwd       | catgataTAGcctcctcctcctcctcctcctcctc     | 231tagFwd       | atgctTAGaaatcctggagcctcctcctcctcctc       |
| 67tagRev        | gtgctCTAacatggaaaaactcctcctcggggcgaa    | 158tagRev       | aaggcCTAatacagatccccctcctcctcctcctc     | 231tagRev       | cagatctCTAAGcaataaaaccagcaggcggaaaggc     |
| 68tagFwd        | atgagTAGaacttttaaaagtctcgtatctgctggc    | 159tagFwd       | gtaactTAGcttgatcctgggaaccctcctcctcctc   | 232tagFwd       | gctgctTAGctcctcctcctcctcctcctcctc         |
| 68tagRev        | aaagtCTAacatggaaaaactcctcctcggggcg      | 159tagRev       | tcaagCTAaggttacatcctccccctcctcctcctc    | 232tagRev       | ccaagCTAatcagcaataaaaccagcaggcagg         |
| 69tagFwd        | gtagagTAGTtttaaaagtctcgtatctgctggcgg    | 160tagFwd       | actcgtTAGgactcctcctcctcctcctcctcctc     | 233tagFwd       | gataaaTAGgagcctcctcctcctcctcctcctc        |
| 69tagRev        | cttbaaCTAgtcctcctcctcctcctcctcctcctc    | 160tagRev       | cgatCTAagcgttagcagatccccctcctcctcctc    | 233tagRev       | ggctcCTAatctatcagcaataaaaccagcaggc        |
| 70tagFwd        | gcaactTAGaaagtctcgtatctgctggcgggtattatc | 161tagFwd       | cgcttTAGcgttagcagatccccctcctcctcctc     | 234tagFwd       | taaactTAGcctcctcctcctcctcctcctcctc        |
| 70tagRev        | acttctTAGgtctcctcctcctcctcctcctcctc     | 161tagRev       | cccaagCTAaaggcagtagtaccatgccccctc       | 234tagRev       | caaccgCTAAGatcttaccagcaataaaaccagcaggc    |
| 71tagFwd        | cttttTAGgttctcgtatctgctggcgggtattatcc   | 162tagFwd       | cttgatTAGtggggaaccggagctgaaatgaaagcactc | 235tagFwd       | cttggaTAGgtgagcgtgggtcctcctcctcctc        |

**Table S3. Cont.**

| Oligonucleotide | Nucleotide sequence (5'–3')                 | Oligonucleotide | Nucleotide sequence (5'–3')             | Oligonucleotide | Nucleotide sequence (5'–3')                |
|-----------------|---------------------------------------------|-----------------|-----------------------------------------|-----------------|--------------------------------------------|
| 71tagRev        | cagaacCTAaaaagtgcctcatcattgggaaaacgcttc     | 162tagRev       | tcccaCTAatacaagcgaggttaacatgatcccccaatg | 235tagRev       | ctcaaccCTAaccagatttatcagcaataaaccagccagc   |
| 72tagFwd        | ttaaaTAGctgctatgctggcgcggtatattccccg        | 163tagFwd       | gatcgtTAGaaaccggagctgaatgaagccataacc    | 236tagFwd       | ggagcCTAGagcgtgggtctcgcggtatcattgagc       |
| 72tagRev        | agcagCTAatttaaagtgctcatttggaaac             | 163tagRev       | cggttCTAacgattcaagggaggttaacatgatcccc   | 236tagRev       | cacgctcCTAaggctccagatttatcagcaataaac       |
| 73tagFwd        | aaagtTAGctatggtggcggtatattccccgatg          | 164tagFwd       | gtttgTAGccggagctgaatgaagccataccaaac     | 237tagFwd       | gcccgtTAGcgtgggtctcgcggtatcattgagc         |
| 73tagRev        | catagCTAaaactttaaaagtgctcattctggaaaac       | 164tagRev       | ctccggCTAcaaacgattcaagggaggttaacatgatc  | 237tagRev       | ccagCTAaccggctccagatttatcagcaataaac        |
| 74tagFwd        | gtctgTAGtggtggcggtatattccccgatgag           | 165tagFwd       | gggaaTAGagagctgaatgaagccataccaaagcagc   | 238tagFwd       | gagcCTAAGctctcgggtatcattgagcactg           |
| 74tagRev        | gcacaCTAcagaaattaaaagtgctcattctgg           | 165tagRev       | cagctcCTAattccccagatcaagggaggttaacatg   | 238tagRev       | gagcccCTAactcaaccggctccagatttatcag         |
| 90tagFwd        | caactTAGcggcgcatacactatctcagaaatgac         | 166tagFwd       | gaacgCTAAGctgaatgaagccataccaaagcagc     | 239tagFwd       | gagcCTAAGctctcgggtatcattgagcactggggc       |
| 90tagRev        | gcggcgCTAaggtgctcttgccccggctcaaac           | 166tagRev       | atcagCTAaggttccccagatcaagggaggttac      | 239tagRev       | gagaCTAaagctcaaccggctccagatttatcag         |
| 91tagFwd        | ctcggTAGcgcatacaactatctcagaaatgacttg        | 167tagFwd       | ccggagTAGaaatgaagccataccaaagcagc        | 240tagFwd       | cgtggTAGcgggtatcattgagcactggggcag          |
| 91tagRev        | gtatcggCTAaccaggtgctcttgccccggctcaatac      | 167tagRev       | ctcgtCTAactccggttccccagatcaagggag       | 240tagRev       | accgCTAaccagctcaaccggctccagatttatcag       |
| 92tagFwd        | ggtcgtTAGatacaactatctcagaaatgacttggtg       | 168tagFwd       | gagctTAGAagcattaccaaagcagcagcgtgac      | 241tagFwd       | ggcctTAGggtatcattgagcactggggcagatg         |
| 92tagRev        | gtgtatCTAagcagcaggtgctcttgccccggc           | 168tagRev       | ggctcCTAcaagctccgggtccccagatcaagcgc     | 241tagRev       | gataccCTAagaccacgctcaaccggctccagatttatc    |
| 93tagFwd        | gcggcTAGcaactatctcagaaatgacttggttgag        | 169tagFwd       | ctgaatTAGgccataccaaagcagcagcgtgaccc     | 242tagFwd       | gtctcgtTAGactcattgagcactggggcagatgg        |
| 93tagRev        | atagctTAGcggcagcaggtgctcttgccccgg           | 169tagRev       | gtagggcCTAattcagctccggtccccagatcaag     | 242tagRev       | caatgatCTAagcagaccacgctcaaccggctccag       |
| 94tagFwd        | gcacatTAGattctcagaatgacttggttgagatc         | 170tagFwd       | aatgaatTAGattaccaaagcagcagcgtgacacacg   | 243tagFwd       | gcgggtTAGattgagcactggggcagatggttaag        |
| 94tagRev        | gaataCTAatgaggcagcagcaggtgctctggc           | 170tagRev       | ggatcCTAattcattcagctccggttccccagatc     | 243tagRev       | gaaCTAaccggctccagcactccacggctcc            |
| 95tagFwd        | catacTAGctcagaatgacttggttgagatc             | 171tagFwd       | gaagcCTAAGcagcagcagcagcgtgacacacagatg   | 244tagFwd       | ggatcTAGcagcactggggcagatggttaagccc         |
| 95tagRev        | ctgagCTAgtgatcggcgacagcaggtgctcttg          | 171tagRev       | ggttggCTAaggtcattcagctccggttccccagc     | 244tagRev       | gtgctcCTAagatcccgagacccacgctcaaccggctc     |
| 96tagFwd        | caatTAGcagaatgacttggttgagatcacc             | 172tagFwd       | ggcctaTAGaacagcagcagcgtgacacacagatgctg  | 261tagFwd       | atctacTAGcggggagctcaggcaactatggagtg        |
| 96tagRev        | ttctcCTAaatagtgatcggcgacagcaggttgctc        | 172tagRev       | ctcgtCTAataggctcattcagctccggttccc       | 261tagRev       | ccccgtCTAgttagtaactcagatcaggggagggc        |
| 97tagFwd        | ta tctTAGaagactggttgagatcaccagctc           | 173tagFwd       | atacctTAGagcagcagctgacacacagcctctag     | 262tagFwd       | ctacaCTAAGggagctcagcgaactatggtgaaoc        |
| 97tagRev        | gtcaCTAagaatgtagtctggcgacagcaggttg          | 173tagRev       | ctcgtCTAatgtagtggctcattcagctccggttc     | 262tagRev       | gactcccCTAagctgtagtaactaagcagcaggggg       |
| 98tagFwd        | ctcagTAGgactggttgagatcaccagctcagc           | 174tagFwd       | ccaaactTAGagcgtgacacacagcagcctctagc     | 263tagFwd       | caagcogTAGagctcagcgaactatggtgaaagaaatg     |
| 98tagRev        | caagcCTAactcagaaatgtagtctggcgacagcag        | 174tagRev       | agcctCTAagttggttagtggctcattcagctcccgc   | 263tagRev       | ctgactCTAagctcgtgtagtaactaagcagcagggagg    |
| 99tagFwd        | cagaatTAGctggttgagtagtaccagctcacagaa        | 175tagFwd       | aacgctCTAAGcgtgacacacagatgctctgagcaatg  | 264tagFwd       | gacgggCTAAGcagcgaactatggtgacagcaaatagac    |
| 99tagRev        | aa ccaaCTAattctgagaatagtgatcggcgacagc       | 175tagRev       | gtcagCTAagctggttggtagtggctcattcagctc    | 264tagRev       | gactcCTAAGcggctcgtgtagtaactcagctacg        |
| 100tagFwd       | aa tgaCTAGgttagtagtaccacagctcacagaaaag      | 176tagFwd       | gacgagTAGaaacacacagcagctgtagcaaatggc    | 265tagFwd       | gggagTAGAGcaactatggtgaaagaaatagacaatc      |
| 100tagRev       | ctcaacCTAgtcattctgagaatagtgatcggcg          | 176tagRev       | ggtcctCTAactcgtcgttggtagtggcttctcag     | 265tagRev       | tagtgcCTAactccccctcgtgtagtaactacg          |
| 101tagFwd       | gactgTAGgagtagtaccacagctcacagaaaagc         | 177tagFwd       | gagcgtTAGaccacagctgctctgtagcaaatggcaac  | 266tagFwd       | gagctcagTAGaactatggtgaaagaaatagacagatcgc   |
| 101tagRev       | gtactcCTAcaagctcattctgagaatagtgatcggg       | 177tagRev       | cgtggtCTAaagcgtcgtctggttggtagtggctctc   | 266tagRev       | catagCTAactgactccgctcgtgtagtaactaactgcg    |
| 102tagFwd       | ttgggtTAGtactcaccagctcacagaaaagcactc        | 178tagFwd       | cgtgacTAGacagtgctctgtagcaaatggcaacaacg  | 267tagFwd       | caggcaTAGatggatgaaacgaaatagacagatcgcctg    |
| 102tagRev       | gagtaCTAaaccagctcattctgagaatagtgatg         | 178tagRev       | catcgtCTAagctcagctcgttggtagtggcttc      | 267tagRev       | catcctCTAatgctcagctccccctcgtgtagtaactaac   |
| 103tagFwd       | gttgagTAGtaccagctcacagaaaagcactctacg        | 179tagFwd       | gacacCTAAGtgcctctgtagcaaatggcaacaacttg  | 268tagFwd       | gaaactTAGatgaaacgaaatagacagatcgcctgag      |
| 103tagRev       | gg tgaCTAactcaaccagctcattctgagaatgag        | 179tagRev       | ggatCTAagctgctcagctcgtcttggtatggc       | 268tagRev       | gttctcCTAagttgctcagctcgtccccctcgtgtagataac |
| 104tagFwd       | gagtaCTAGcagctcacagaaaagcactctacggatg       | 180tagFwd       | ccaagCTAagctgtagcaaatggcaacaactggcgc    | 269tagFwd       | caactatTAGaaacgaaatagacagatcgtgtagatag     |
| 104tagRev       | gactgCTAgtactcacaacagctcattctgagaatag       | 180tagRev       | tacaggCTAagtggttgtagcagctcgtctggttggta  | 269tagRev       | ctattctcCTAactcagctgctgactccccctcgtg       |
| 105tagFwd       | gtactcaTAGctcacagaaaagcactctacggatggc       | 181tagFwd       | cgtgTAGgttagcaaatggcaacaacttgccacaac    | 270tagFwd       | ggatgaactTAGatagacagatcgtgtagataggtg       |
| 105tagRev       | ctgtgacCTAatgtagtactcaaccagctcattctgag      | 181tagRev       | tgtcactCTAactcgtggttagcagctcgtctggttgg  | 270tagRev       | ctattctcCTAactcagctcgtccccctcgtccccctcgtg  |
| 106tagFwd       | ctcaacTAGaagaaaagcactctacagatggcatg         | 182tagFwd       | atgctTAGcgaatggcaacaacttgccgcaaacacta   | 271tagFwd       | gatgaatTAGaaatagacagatcgtcagataggtgctc     |
| 106tagRev       | ttctgCTAatggtgagtagtactcaaacagctcattctg     | 182tagRev       | catctgCTAAGgctcgtggtgtagcagctcgtcttgg   | 271tagRev       | gtctatCTAactcagctcagctccccctcgtccccctcgtg  |
| 118tagFwd       | cagtaTAGaaatgatcagctgctgccaacaactg          | 183tagFwd       | cctgtaTAGatggcaacaacttgccgcaaacactataac | 272tagFwd       | gaaagTAGagacagatcgtcagataggtgctcactg       |
| 118tagRev       | taattcCTAactgcatgccatccgttaagatg            | 183tagRev       | ggcctCTAatcaagcactggtggtcagcgtcgtcgc    | 272tagRev       | tgtcctCTAactcagctcagctgactccccctc          |
| 119tagFwd       | gt aagaTAGttagttagtgcctgctgccaataaccatgagtg | 184tagFwd       | gtagcaTAGcacaacaacttgccgcaaacactataac   | 271tagFwd       | gabgaaTAGaaatagacagatcgtcagataggtgctc      |
| 119tagRev       | gtaaaCTAacttagctcatgccatccgttaagatg         | 184tagRev       | gttgcCTAactgcaagcagctggtggtgtagcgtc     | 271tagRev       | gtctatCTAactcagctcagctccccctcgtccccctc     |
| 120tagFwd       | agaaaTAGtgcagtgctgccaataaccatgagtg          | 199tagFwd       | cttactTAGgctccccgcaacaacttaactcagcctgg  | 284tagFwd       | ctgattCTAactggttaactcagcagcagcttctac       |
| 120tagRev       | cactgcaCTAattcttactgcatgccatccgttaag        | 199tagRev       | ggaagCTAagtaagtagtgcagcttaactagtttg     | 284tagRev       | ccaatgCTAaactcagtgagcagcactctcagcagctc     |

**Table S4. DNA oligomers used in this study**

| Oligonucleotide | Nucleotide sequence (5'-3')                           |
|-----------------|-------------------------------------------------------|
| HX0975          | CTTATAAGCGGGACAGGCTGACAACCC                           |
| HX0976          | CTGCAGTTTCAAACGCTAAATTGCCTG                           |
| HX0977          | GCCTGTCCCGCTTATAAGGACGAAAGGGCCCTCGTGATACGCC           |
| HX0978          | CAGGCAATTTAGCGTTTGAACCTGCAGCTACGGGGTCTGACGCTCAGTGAACG |
| HX1057          | CGGCAATAGTTAATAGACTGGATGGAGGCGGATAAAG                 |
| HX1058          | CTATTAACCTATTGCCGGGAAGCTAGAGTAAGTAGTTC                |
| HX1065          | CGGATAAAATCGCAGGACCACTTCTGCGCTCGGCCCTTCCG             |
| HX1066          | GGTCCTGCGAATTTATCCGCCTCCATCCAGTCTATTAATTGTTG          |
| HX1063          | CGGATAAAATACGACGACCACTTCTGCGCTCGGCCCTTCCG             |
| HX1064          | GGTCCTGCGTATTTATCCGCCTCCATCCAGTCTATTAATTGTTG          |
| HX1067          | CGGATAAAATCGCAGGACCACTTCTGCGCTCGGCCCTTCCG             |
| HX1068          | GGTCCTGCGAGTTTATCCGCCTCCATCCAGTCTATTAATTGTTG          |
| HX1069          | CGGATAAAATCGCAGGACCACTTCTGCGCTCGGCCCTTCCG             |
| HX1070          | GGTCCTGCGAATTTATCCGCCTCCATCCAGTCTATTAATTGTTG          |

**Table S5. Data collection and structure refinement statistics**

|                                                     | V216-AcrF                                                | E166N + Cephalexin                                        | E166A/V216-AcrF + Cephalexin                              |
|-----------------------------------------------------|----------------------------------------------------------|-----------------------------------------------------------|-----------------------------------------------------------|
| <b>Data collection</b>                              |                                                          |                                                           |                                                           |
| X-ray source                                        | Rigaku FR-E SuperBright                                  | SSRL-11-1                                                 | SSRL-7-1                                                  |
| Space group                                         | P2 <sub>1</sub> 2 <sub>1</sub> 2 <sub>1</sub>            | P2 <sub>1</sub> 2 <sub>1</sub> 2 <sub>1</sub>             | P2 <sub>1</sub> 2 <sub>1</sub> 2 <sub>1</sub>             |
| Unit cells parameters, Å                            | <i>a</i> = 45.47<br><i>b</i> = 7.24<br><i>c</i> = 128.33 | <i>a</i> = 46.46<br><i>b</i> = 47.04<br><i>c</i> = 127.58 | <i>a</i> = 46.29<br><i>b</i> = 47.03<br><i>c</i> = 128.31 |
| No. of reflections measured                         | 306,191                                                  | 217,768                                                   | 225,670                                                   |
| No. of unique reflections                           | 41,549                                                   | 26,744                                                    | 31,711                                                    |
| Resolution, Å                                       | 26.54–1.54 (1.63–1.54)                                   | 37.86–1.80 (1.90–1.80)                                    | 37.93–1.70 (1.79–1.70)                                    |
| <i>R</i> <sub>merge</sub>                           | 0.064 (0.188)                                            | 0.097 (0.604)                                             | 0.112 (0.812)                                             |
| Mean <i>I</i> /σ ( <i>I</i> )                       | 16.3 (6.5)                                               | 15.0 (3.0)                                                | 15.2 (2.5)                                                |
| Completeness, %                                     | 100 (100)                                                | 100 (100)                                                 | 100 (99.9)                                                |
| Redundancy                                          | 7.4 (7.1)                                                | 8.1 (8.4)                                                 | 7.1 (7.2)                                                 |
| <b>Refinement</b>                                   |                                                          |                                                           |                                                           |
| Resolution, Å                                       | 25.00–1.54                                               | 25.00–1.80                                                | 25.00–1.70                                                |
| No. of reflections (test set)                       | 39,324 (2,082)                                           | 25,336 (1,343)                                            | 30,049 (1,593)                                            |
| <i>R</i> <sub>work</sub> / <i>R</i> <sub>free</sub> | 0.140/0.170                                              | 0.166/0.210                                               | 0.154/0.188                                               |
| No. of atoms                                        |                                                          |                                                           |                                                           |
| Protein                                             | 2,210                                                    | 2,110                                                     | 2,172                                                     |
| Other                                               | 505                                                      | 214                                                       | 311                                                       |
| Mean overall B value, Å <sup>2</sup>                | 16.4                                                     | 23.7                                                      | 19.7                                                      |
| rms bonds, Å <sup>2</sup>                           | 0.016                                                    | 0.015                                                     | 0.017                                                     |
| rms angles, °                                       | 1.85                                                     | 1.82                                                      | 1.92                                                      |
| Ramachandran,* %                                    |                                                          |                                                           |                                                           |
| Favored regions                                     | 99.3                                                     | 98.5                                                      | 98.9                                                      |
| Allowed regions                                     | 0.7                                                      | 1.5                                                       | 1.1                                                       |
| Disallowed regions                                  | 0                                                        | 0                                                         | 0                                                         |

SSRL, Stanford Synchrotron Radiation Lightsources.  $R_{\text{sym}} = \frac{\sum h \sum j |I(h) - I(h)j|}{\sum h \sum j I(h)}$  where  $I(h)$  is the mean intensity of symmetry-related reflections.  $R_{\text{work}} = \frac{\sum ||F_{\text{obs}}| - |F_{\text{calc}}||}{\sum |F_{\text{obs}}|}$ . *R*<sub>free</sub> for 5% of reflections was excluded from refinement.

\*As defined in Molprobity.
